# Supplementary material for: Including high-frequency variability in coastal ocean acidification projections
Source: Copernicus journal article supplement (doi:10.5194/bg-12-5853-2015), 2015-10-14
Supplement: Supplementary file 1 [file bg-12-5853-2015-supplement.pdf]

Supplement of Biogeosciences, 12, 5853–5870, 2015  
<http://www.biogeosciences.net/12/5853/2015/>  
doi:10.5194/bg-12-5853-2015-supplement  
© Author(s) 2015. CC Attribution 3.0 License.

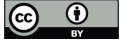

*Supplement of*

## **Including high-frequency variability in coastal ocean acidification projections**

**Y. Takeshita et al.**

*Correspondence to:* Y. Takeshita ([ytakeshita@carnegiescience.edu](mailto:ytakeshita@carnegiescience.edu))

The copyright of individual parts of the supplement might differ from the CC-BY 3.0 licence.

## Supplement

Phosphate concentrations were estimated ( $PO_4^{est}$ ) for the hydrographic data by establishing a regional empirical relationship from historical data using the approach described in *Juranek et al.*, 2009 and *Alin et al.*, 2012. The North American Carbon Program 2007 West Coast Cruise data at all depths were used to calculate the coefficients for the equation:

$$PO_4^{est} = \alpha_0 + \alpha_1(O_2 - O_{2,r}) + \alpha_2(T - T_r) + \alpha_3(O_2 - O_{2,r}) \times (T - T_r) \quad (1)$$

where the subscript r refers to a mean reference value ( $O_{2,r} = 156.7 \mu\text{mol kg}^{-1}$  and  $T_r = 9.045 \text{ }^\circ\text{C}$ ). The  $PO_4^{est}$  values were in excellent agreement with measured values (Figure S1; RMSE =  $0.15 \mu\text{mol kg}^{-1}$ ). This error in  $PO_4^{est}$  propagated to a  $\sim 4 \mu\text{mol kg}^{-1}$  uncertainty in preformed total alkalinity. The coefficients of the regression were  $\alpha_0 = 1.758$ ,  $\alpha_1 = -6.52 \times 10^{-3}$ ,  $\alpha_2 = -0.102$ , and  $\alpha_3 = -1.88 \times 10^{-4}$ .

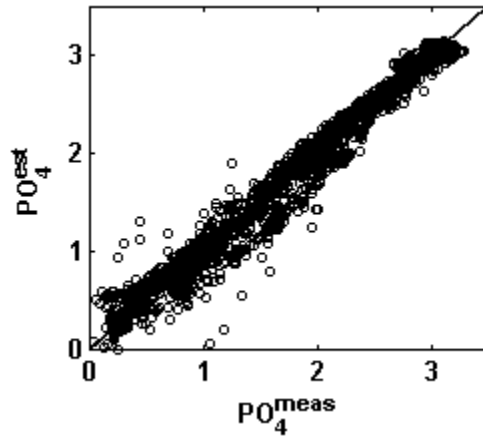

Figure S1: Measured phosphate ( $PO_4^{meas}$ ) versus estimated phosphate ( $PO_4^{est}$ ) ( $R^2 = 0.98$ ). Solid line represents a 1:1 relationship

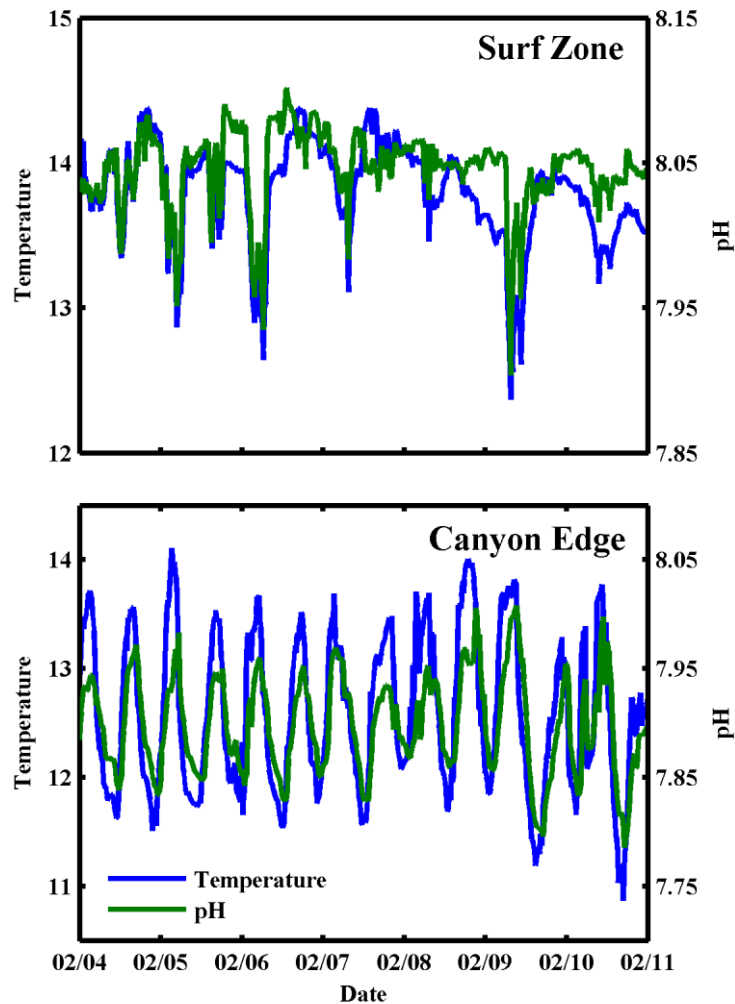

Figure S2: Week long time series of temperature and pH at the surf zone (top) and canyon edge (bottom).

Alin, S. R., Feely, R. A., Dickson, A. G., Hernández-Ayón, J. M., Juranek, L. W., Ohman, M. D. and Goericke, R.: Robust empirical relationships for estimating the carbonate system in the southern California Current System and application to CalCOFI hydrographic cruise data (2005–2011), *J. Geophys. Res.*, 117(C5), C05033, doi:10.1029/2011JC007511, 2012.

Juranek, L. W., Feely, R. a., Peterson, W. T., Alin, S. R., Hales, B., Lee, K., Sabine, C. L. and Peterson, J.: A novel method for determination of aragonite saturation state on the continental shelf of central Oregon using multi-parameter relationships with hydrographic data, *Geophys. Res. Lett.*, 36(24), L24601, doi:10.1029/2009GL040778, 2009.
